# Supplementary material for: Histone tail analysis reveals H3K36me2 and H4K16ac as epigenetic signatures of diffuse intrinsic pontine glioma
Source: Springer Nature journal article supplement (doi:10.1186/s13046-020-01773-x), 2020-11-25
Supplement: MOESM10 [file 18625868]

Color Key

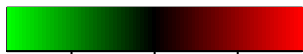

-2 0 2

Row Z-Score

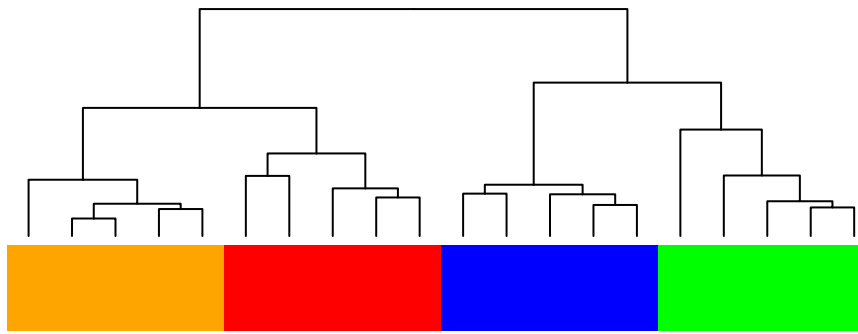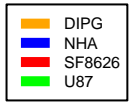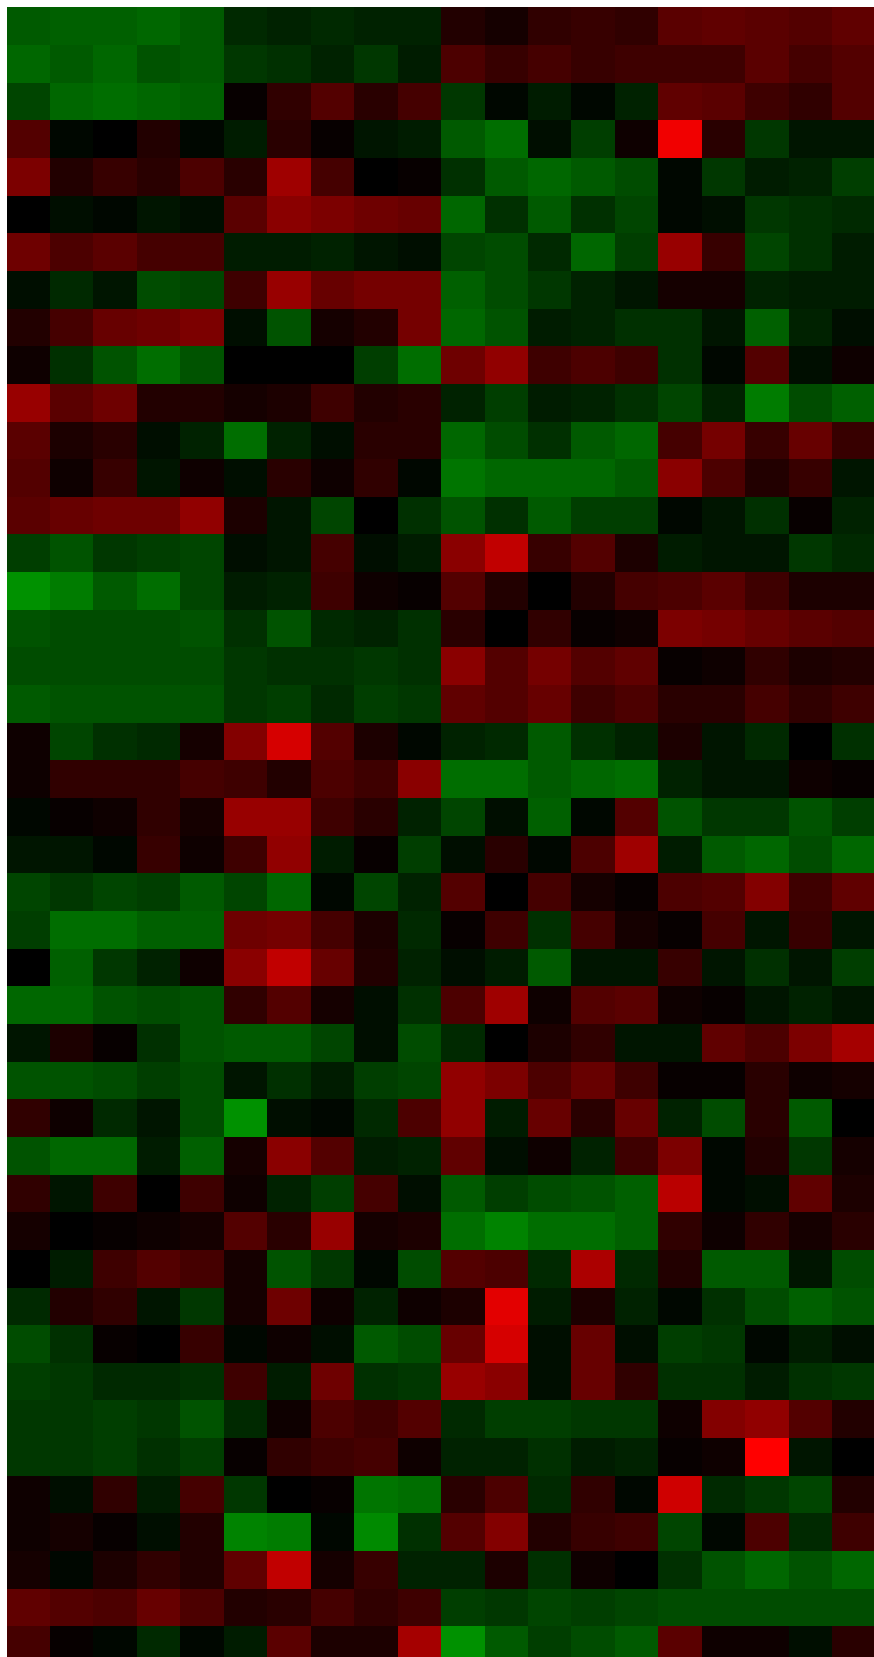

- H3.3 K27me1
- H3.1 K27me2
- H3.1 K27me1
- H3 K23ac
- H4 K16ac
- H3.1 K36me2
- H3 K14ac
- H3.3 K36me2
- H3 K9me2
- H3 K9me1
- H3.1 K36me3
- H3 K79me1
- H3 K4me1
- H3.3 K36ac
- H3.3 K36me3
- H3 K79me2
- H3.1 K36me1
- H3.1 K27me3
- H3.3 K27me2
- H4 K8ac
- H3 K9me3
- H2A K5ac
- H3 K18ac
- H3.3 K36me1
- H4 K5ac
- H4 K12ac
- H3.3 K27ac
- H4 K20me1
- H3.3 K27me3
- H4 K20me3
- H3 K9ac
- H3 K4me2
- H2A K9ac
- H3 K4me3
- H3.1 K36ac
- H3 K18me1
- H3 K79me3
- H1.4 K25me2
- H1.4 K25me3
- H3 K23me1
- H1.4 K25me1
- H3.1 K27ac
- H3.3 K27M
- H4 K20me2

- DIPG 0h
- DIPG JQ1 24h
- DIPG DMSO 24h
- DIPG JQ1 48h
- DIPG DMSO 48h
- SF8626 0h
- SF8626 JQ1 48h
- SF8626 DMSO 24h
- SF8626 JQ1 24h
- NHA JQ1 48h
- NHA DMS
- NHA JQ1 24h
- NHA 0h
- NHA DMSO
- U87 0h
- U87 DMSO 24h
- U87 JQ1 48h
- U87 DMSO 48h
- U87 JQ1 24h
