# Supplementary material for: Histone tail analysis reveals H3K36me2 and H4K16ac as epigenetic signatures of diffuse intrinsic pontine glioma
Source: J Exp Clin Cancer Res. 2020 Nov 25;39:261. doi: 10.1186/s13046-020-01773-x (PMC7687710; doi:10.1186/s13046-020-01773-x)
Supplement: Supplementary file 6 — Additional file 6: S6. Modification states along short peptides (Microsoft Excel format). Distinct combinations of histone peptide modification states with H3.3K27M mutation status in tissues (Independent-sample t test, two-tailed). [file 13046_2020_1773_MOESM6_ESM.xlsx]

## Sheet: tissue vs cell line
SN	PTMs	Mean_tissue	Mean_cell	Fold_tissue/cell	Sig. (2-tailed)	notes
1	H1.4: K25UN	70.1678	94.7482	0.740571	4.05993e-05	un
2	H1.4: K25ME1	29.7072	5.08588	5.84112	3.91967e-05
3	H1.4: K25ME2	0.0456323	0.0383195	1.19084	0.656107	<5
4	H1.4: K25ME3	0.0578406	0.0603562	0.958321	0.947108	<5
5	H1.4: K25AC	0.0215292	0.0672653	0.320063	0.0922056	<5
6	H2A1: K13UN	99.9911	99.983	1.00008	0.0580723	un
7	H2A1: K13AC	0.00893827	0.0169734	0.526606	0.0580723	<5
8	H2A1: K15UN	99.9941	99.9682	1.00026	0.00632683	un
9	H2A1: K15AC	0.00590968	0.0318496	0.18555	0.00632683	<5
10	H2A3: K13UN	99.9759	99.9808	0.999951	0.524702	un
11	H2A3: K13AC	0.0241269	0.0191915	1.25716	0.524702	<5
12	H2A3: K15UN	99.9547	99.9805	0.999742	0.56635	un
13	H2A3: K15AC	0.0452803	0.0195124	2.32059	0.56635	<5
14	H2A: K36UN	99.9721	99.9844	0.999877	0.00630558	un
15	H2A: K36AC	0.0279137	0.0155676	1.79306	0.00630558	<5
16	H2A: K5UN	87.9708	93.4263	0.941607	0.000871554	un
17	H2A: K5AC	12.0292	6.57371	1.82989	0.000871554
18	H2A: K9UN	98.4442	99.1438	0.992944	0.0625229	un
19	H2A: K9AC	1.55584	0.856244	1.81706	0.0625229	<5
20	H3.1: K27UN	45.7302	61.5688	0.74275	0.0403154	un
21	H3.1: K27ME1	34.2909	24.929	1.37554	0.0542671
22	H3.1: K27ME2	12.9423	9.67101	1.33825	0.432626
23	H3.1: K27ME3	5.24509	1.35263	3.8777	0.246204
24	H3.1: K27AC	1.79154	2.47853	0.722822	0.198468	<5
25	H3.1: K36UN	14.8301	23.3837	0.634208	0.119464	un
26	H3.1: K36ME1	12.3928	9.54788	1.29796	0.125469
27	H3.1: K36ME2	55.1085	44.4036	1.24108	0.126019
28	H3.1: K36ME3	17.359	22.2488	0.780224	0.0172757
29	H3.1: K36AC	0.309529	0.416097	0.743886	0.498805	<5
30	H3.3: K27UN	30.5693	47.3348	0.645811	0.0041607	un
31	H3.3: K27ME1	25.0465	12.9194	1.93867	0.0260037
32	H3.3: K27ME2	10.7636	7.53637	1.42822	0.54425
33	H3.3: K27ME3	4.99842	0.639533	7.81574	0.158766
34	H3.3: K27AC	2.18066	2.34237	0.930966	0.781112	<5
35	H3.3: K27M	26.4415	29.2275	0.904676	0.68632
36	H3.3: K36UN	8.2999	9.37005	0.88579	0.677947	un
37	H3.3: K36ME1	12.7094	5.32585	2.38636	0.0421999
38	H3.3: K36ME2	62.3097	60.7223	1.02614	0.820473
39	H3.3: K36ME3	14.2703	8.77972	1.62537	0.00399547
40	H3.3: K36AC	2.41069	15.802	0.152555	0.000130525
41	H3: K122UN	99.9634	99.9911	0.999724	0.478604	un
42	H3: K122AC	0.0365515	0.00890777	4.10333	0.478604	<5
43	H3: K9UN	33.7642	24.6181	1.37152	0.094664	un
44	H3: K9ME1	30.1713	24.7678	1.21817	0.020169
45	H3: K9ME2	26.9685	42.2612	0.638137	0.00978898
46	H3: K9ME3	3.52411	6.38829	0.55165	0.00811388
47	H3: K9AC	5.5719	1.96461	2.83613	0.0036782
48	H3: K14UN	59.7535	60.8803	0.981492	0.724235	un
49	H3: K14AC	40.2465	39.1197	1.0288	0.724235
50	H3: K18UN	91.8839	93.2238	0.985628	0.0563749	un
51	H3: K18ME1	1.05954	0.263037	4.02811	0.0519993	<5
52	H3: K18AC	7.05651	6.51318	1.08342	0.428433
53	H3: K23UN	63.7042	72.1341	0.883136	0.0286098	un
54	H3: K23ME1	0.125972	0.0619621	2.03305	0.0254016	<5
55	H3: K23AC	36.1698	27.804	1.30089	0.0301507
56	H3: Q19UN	99.6131	99.4058	1.00209	0.0456991	un
57	H3: Q19ME1	0.386858	0.594186	0.651071	0.0456991	<5
58	H3: K56UN	99.9291	99.9267	1.00002	0.973606	un
59	H3: K56ME1	0.0315666	0.0544756	0.579464	0.477137	<5
60	H3: K56AC	0.0392993	0.0188201	2.08816	0.62911	<5
61	H3: Q55UN	99.3844	99.4842	0.998997	0.414846	un
62	H3: Q55ME1	0.615581	0.515838	1.19336	0.414846	<5
63	H3: K64UN	99.9718	99.9831	0.999887	0.15123	un
64	H3: K64AC	0.0281917	0.016864	1.67171	0.15123	<5
65	H3: K79UN	56.4791	67.4417	0.83745	0.00959785	un
66	H3: K79ME1	25.3405	24.1699	1.04843	0.713224
67	H3: K79ME2	18.0441	8.3353	2.16478	0.038456
68	H3: K79ME3	0.081918	0.0457773	1.78949	0.390712	<5
69	H3: K79AC	0.0544186	0.00725159	7.50437	0.569656	<5
70	H3: R42UN	99.942	99.9897	0.999523	0.401235	un
71	H3: R42ME2	0.0580423	0.0103149	5.62704	0.401235	<5
72	H3: R49UN	99.665	99.8499	0.998148	0.306938	un
73	H3: R49ME2	0.334972	0.150091	2.23179	0.306938	<5
74	H3R2UN: K4UN	87.4794	85.3934	1.02443	0.404902	un
74	H3R2UN: K4ME1	11.9708	13.3523	0.896536	0.550319
76	H3R2UN: K4ME2	0.386833	0.868753	0.445273	0.00489208	<5
77	H3R2UN: K4ME3	0.137296	0.318681	0.430826	0.0187122	<5
78	H3R2UN: K4AC	0.0256068	0.0668732	0.382916	0.00386481	<5
79	H3R2UN: Q5UN	99.477	99.335	1.00143	0.000309966	un
80	H3R2UN: Q5ME1	0.522959	0.665026	0.786373	0.000309966	<5
81	H4: K5UN	93.9828	95.8105	0.980923	0.00320025	un
82	H4: K5AC	6.0172	4.18946	1.43627	0.00320025
83	H4: K8UN	86.5471	90.796	0.953203	0.12057	un
84	H4: K8AC	13.4529	9.20396	1.46165	0.12057
85	H4: K12UN	92.1745	94.7789	0.972521	0.185117	un
86	H4: K12AC	7.82551	5.22106	1.49884	0.185117
87	H4: K16UN	49.8503	51.7896	0.962553	0.707851	un
88	H4: K16AC	50.1497	48.2104	1.04023	0.707851
89	H4: K20UN	0.791318	3.38995	0.23343	0.00233824	un
90	H4: K20ME1	5.38155	3.6564	1.47181	0.146718
91	H4: K20ME2	84.5173	90.7401	0.931422	0.00231496
92	H4: K20ME3	8.51384	2.20796	3.85598	0.00042801
93	H4: K20AC	0.795947	0.00557051	142.886	0.441445	<5
