# Supplementary material for: Histone tail analysis reveals H3K36me2 and H4K16ac as epigenetic signatures of diffuse intrinsic pontine glioma
Source: J Exp Clin Cancer Res. 2020 Nov 25;39:261. doi: 10.1186/s13046-020-01773-x (PMC7687710; doi:10.1186/s13046-020-01773-x)
Supplement: Supplementary file 11 — Additional file 11: S11. Validation of changes in H3K27M and H3K27Ac in DIPG cells after Bromodomain inhibition. A Western blot of extracted histones for H3K27M and H3K27Ac from DIPG cell lines SF8628 and DIPG007 after 24 h of Bromodomain inhibition was performed in triplicate and compared to DMSO treated controls. B, C Bar graphs depicting mean OD value ± SEM across replicates for each treatment group, with p-values for between group comparisons (Independent-sample t test, two-tailed). [file 13046_2020_1773_MOESM11_ESM.xlsx]

## Sheet: total_p value
SN	Histone PTMs	NHA 24h	NHA 48h	U87 24h	U87 48h	SF8628 24h	SF8628 48h	DIPG 007 24h	DIPG 007 48h
1	H1.4: K25UN	0.645142	0.464806	0.502821	0.0120713	0.0699166	0.0630487	0.705072	0.719338
2	H1.4: K25ME1	0.741027	0.588138	0.246004	0.00873293	0.0216664	0.0661216	0.783057	0.595362
3	H1.4: K25ME2	0.60181	0.608265	0.00855862	0.650166	0.784139	0.333682	0.527148	0.062374
4	H1.4: K25ME3	0.350935	0.989698	0.786787	0.22147	0.510005	0.260036	0.896422	0.343745
5	H1.4: K25AC	0.418539	0.0996645	0.389927	0.374904	0.319467	0.746042	0.505562	0.334474
6	H2A: K36UN	0.587454	0.411371	0.742805	0.201096	0.358831	0.94722	0.329451	0.499344
7	H2A: K36AC	0.587454	0.411371	0.742805	0.201096	0.358831	0.94722	0.329451	0.499344
8	H2A: K5UN	0.0647503	0.0281527	0.852814	0.335854	0.131717	0.0792007	0.784608	0.544858
9	H2A: K5AC	0.0647503	0.0281527	0.852814	0.335854	0.131717	0.0792007	0.784608	0.544858
10	H2A: K9UN	0.962163	0.143256	0.421442	0.462334	0.822218	0.105817	0.748262	0.90667
11	H2A: K9AC	0.962163	0.143256	0.421442	0.462334	0.822218	0.105817	0.748262	0.90667
12	H2A1: K13UN	0.0409081	0.0884829	0.657383	0.41642	0.797505	0.883923	0.0482308	0.0803968
13	H2A1: K13AC	0.0409081	0.0884829	0.657383	0.41642	0.797505	0.883923	0.0482308	0.0803968
14	H2A1: K15UN	0.395239	0.0655828	0.263779	0.390272	0.0168454	0.190383	0.0787261	0.948271
15	H2A1: K15AC	0.395239	0.0655828	0.263779	0.390272	0.0168454	0.190383	0.0787261	0.948271
16	H2A3: K13UN	0.307794	0.829264	0.370084	0.436086	0.625274	0.469288	0.711691	0.25209
17	H2A3: K13AC	0.307794	0.829264	0.370084	0.436086	0.625274	0.469288	0.711691	0.25209
18	H2A3: K15UN	0.848529	0.38079	0.366882	0.288952	0.355896	0.981505	0.590474	0.290928
19	H2A3: K15AC	0.848529	0.38079	0.366882	0.288952	0.355896	0.981505	0.590474	0.290928
20	H3.1: K27UN	0.00210814	0.00562608	0.00194076	0.000659495	0.00188926	0.000738404	0.261953	0.474452
21	H3.1: K27ME1	0.611687	0.159442	0.948542	0.582501	0.0233485	0.0130505	0.687751	0.812349
22	H3.1: K27ME2	0.343545	0.0692401	0.0498612	0.0471173	0.000924904	0.211018	0.135633	0.224163
23	H3.1: K27AC	0.116572	0.138728	0.0471955	0.085363	0.00850844	0.176431	0.0722105	0.150524
24	H3.1: K27ME3	0.0354072	0.010395	0.0231195	0.0273598	0.00636183	0.031061	0.494036	0.310941
25	H3.1: K36UN	0.434247	0.0658823	0.0282007	0.596063	0.54528	0.144798	0.578717	0.838802
26	H3.1: K36ME1	0.21198	0.0109367	0.0376463	0.390247	0.475274	0.784625	0.889206	0.650777
27	H3.1: K36ME2	0.076504	0.0251902	0.144694	0.75286	0.538559	0.258618	0.622649	0.815942
28	H3.1: K36ME3	0.939883	0.343445	0.0282766	0.0336716	0.789885	0.24221	0.183356	0.902377
29	H3.1: K36AC	0.344496	0.0185919	0.576285	0.451154	0.486187	0.978436	0.873396	0.331632
30	H3.3: K27UN	0.272829	0.0352816	0.00755137	0.0133319	0.00688511	0.0220237	0.29717	0.266943
31	H3.3: K27ME1	0.732205	0.663662	0.972662	0.381928	0.80031	0.927293	0.77696	0.0402122
32	H3.3: K27ME2	0.0981778	0.562211	0.0826966	0.167865	0.00120552	0.334704	0.834267	0.902968
33	H3.3: K27M	0.334165	0.639457	0.805246	0.313615	0.065372	0.0120242	0.391206	0.0675016
34	H3.3: K27AC	0.109837	0.197344	0.299591	0.623436	0.156031	0.73588	0.0648042	0.768282
35	H3.3: K27ME3	0.410894	0.448135	0.0960708	0.136763	0.127577	0.917516	0.618411	0.524208
36	H3.3: K36UN	0.134012	0.0743246	0.0109921	0.162613	0.0141372	0.605514	0.074878	0.0756404
37	H3.3: K36ME1	0.172028	0.00186197	0.507415	0.0315343	0.0496093	0.0696487	0.149979	0.408195
38	H3.3: K36ME2	0.412869	0.656312	0.0717071	0.575986	0.792916	0.514882	0.602974	0.899161
39	H3.3: K36ME3	0.687711	0.554635	0.122753	0.166149	0.190882	0.256325	0.161	0.759097
40	H3.3: K36AC	0.0268537	0.000194252	0.29853	0.0098185	0.0408572	0.00492225	0.757992	0.175542
41	H3: K122UN	0.168706	0.735032	0.173261	0.314809	0.359379	0.465345	0.473762	0.210944
42	H3: K122AC	0.168706	0.735032	0.173261	0.314809	0.359379	0.465345	0.473762	0.210944
43	H3: K14UN	0.0655876	0.790543	0.0117467	0.383711	0.955316	0.661292	0.74047	0.74853
44	H3: K14AC	0.0655876	0.790543	0.0117467	0.383711	0.955316	0.661292	0.74047	0.74853
45	H3: K18UN	0.0974122	0.0342655	0.770396	0.194181	0.041885	0.0611798	0.2758	0.131178
46	H3: K18ME1	0.198293	0.343354	0.0364931	0.640881	0.532878	0.905946	0.338262	0.36606
47	H3: K18AC	0.0979492	0.0497304	0.728568	0.177974	0.0384529	0.0548875	0.338283	0.102767
48	H3: K23UN	0.328095	0.303215	0.067048	0.234778	0.895761	0.471757	0.891712	0.375949
49	H3: K23ME1	0.196039	0.760898	0.252726	0.705425	0.480687	0.539697	0.0507778	0.0540523
50	H3: K23AC	0.327154	0.304206	0.0672755	0.234272	0.89511	0.47348	0.893336	0.374737
51	H3: K56UN	0.744524	0.778162	0.139117	0.150715	0.388704	0.911014	0.358612	0.650086
52	H3: K56ME1	0.683586	0.791182	0.254408	0.161698	0.558716	0.914802	0.484653	0.043641
53	H3: K56AC	0.831388	0.771969	0.639836	0.198913	0.460321	0.828576	0.404253	0.569866
54	H3: K64UN	0.293087	0.0463262	0.492295	0.316361	0.852062	0.866637	0.779207	0.519793
55	H3: K64AC	0.293087	0.0463262	0.492295	0.316361	0.852062	0.866637	0.779207	0.519793
56	H3: K79UN	0.790931	0.931005	0.00467992	0.553342	0.856425	0.0272792	0.679621	0.913428
57	H3: K79ME1	0.273419	0.009412	0.00754074	0.139292	0.927033	0.0636403	0.90408	0.807702
58	H3: K79ME2	0.474756	0.599373	0.189346	0.737862	0.85741	0.0350308	0.537062	0.136945
59	H3: K79ME3	0.297883	0.916441	0.102264	0.440611	0.667964	0.650503	0.621061	0.61887
60	H3: K79AC	0.772951	0.320936	0.0691204	0.353496	0.392889	0.619516	0.387644	0.95812
61	H3: K9UN	0.871841	0.431886	0.340822	0.292224	0.0884678	0.379888	0.480854	0.650958
62	H3: K9ME1	0.939559	0.535858	0.793834	0.322404	0.427838	0.994047	0.722416	0.805827
63	H3: K9ME2	0.950171	0.506169	0.900252	0.265675	0.198783	0.624816	0.558404	0.853897
64	H3: K9AC	0.29227	0.0155728	0.357741	0.0126169	0.809163	0.373906	0.923274	0.240576
65	H3: K9ME3	0.814972	0.615125	0.417596	0.317843	0.0661985	0.827158	0.996505	0.691995
66	H3: Q19UN	0.333363	0.202647	0.248004	0.860437	0.274051	0.114673	0.553035	0.229814
67	H3: Q19ME1	0.333363	0.202647	0.248004	0.860437	0.274051	0.114673	0.553035	0.229814
68	H3: Q55UN	0.575786	0.142034	0.29507	0.367608	0.76346	0.149819	0.426519	0.540388
69	H3: Q55ME1	0.575786	0.142034	0.29507	0.367608	0.76346	0.149819	0.426519	0.540388
70	H3: R42UN	0.455347	0.766889	0.0941517	0.39932	0.400882	0.586699	0.679347	0.80222
71	H3: R42ME2	0.455347	0.766889	0.0941517	0.39932	0.400882	0.586699	0.679347	0.80222
72	H3: R49UN	0.371008	0.635685	0.267651	0.362486	0.2658	0.700997	0.367281	0.532756
73	H3: R49ME2	0.371008	0.635685	0.267651	0.362486	0.2658	0.700997	0.367281	0.532756
74	H3R2UN: K4UN	0.0945624	0.232108	0.0103895	0.567241	0.151575	0.675587	0.405433	0.585484
75	H3R2UN: K4ME2	0.62949	0.258681	0.784981	0.166962	0.306416	0.291459	0.32747	0.723543
76	H3R2UN: K4AC	0.175743	0.192084	0.355769	0.365909	0.0359187	0.888738	0.536871	0.477999
77	H3R2UN: K4ME1	0.714176	0.0998723	0.00514857	0.693783	0.174082	0.455429	0.448261	0.484882
78	H3R2UN: K4ME3	0.228171	0.82612	0.81784	0.241138	0.18809	0.382306	0.233926	0.916455
79	H3R2UN: Q5UN	0.510203	0.895292	0.0131677	0.571607	0.666896	0.348926	0.682118	0.405266
80	H3R2UN: Q5ME1	0.510203	0.895292	0.0131677	0.571607	0.666896	0.348926	0.682118	0.405266
81	H4: K12UN	0.417688	0.592484	0.309982	0.312379	0.170875	0.602825	0.160286	0.333788
82	H4: K12AC	0.417688	0.592484	0.309982	0.312379	0.170875	0.602825	0.160286	0.333788
83	H4: K16UN	0.657596	0.000425376	0.743915	0.619714	0.868973	0.189048	0.568929	0.575686
84	H4: K16AC	0.657596	0.000425376	0.743915	0.619714	0.868973	0.189048	0.568929	0.575686
85	H4: K20UN	0.133029	0.773108	0.0226083	0.166108	0.0020292	0.87101	0.293608	0.672584
86	H4: K20ME1	0.659837	0.216162	0.23197	0.396526	0.0128305	0.292132	0.545844	0.4041
87	H4: K20ME2	0.924309	0.685019	0.439091	0.789411	0.00212099	0.384173	0.613029	0.337524
88	H4: K20ME3	0.432447	0.0259401	0.108715	0.0116001	0.0164068	0.00426125	0.0803034	0.55878
89	H4: K20AC	0.525598	0.642528	0.0178031	0.37469	0.343828	0.276056	0.493568	0.546194
90	H4: K5UN	0.306935	0.225028	0.00478437	0.016478	0.176639	0.559403	0.992331	0.921833
91	H4: K5AC	0.306935	0.225028	0.00478437	0.016478	0.176639	0.559403	0.992331	0.921833
92	H4: K8UN	0.448354	0.612875	0.497332	0.323156	0.291857	0.214606	0.258258	0.234843
93	H4: K8AC	0.448354	0.612875	0.497332	0.323156	0.291857	0.214606	0.258258	0.234843

## Sheet: NHA
Histone PTMs	NHA_DMSO_24h_mean	NHA_DMSO_48h_mean	NHA_JQ1_24h_mean	fold_JQ124/DMSO24_NHA	NHA_JQ1_48h_mean	fold_JQ148/DMSO48_NHA	NHA_Un_mean		p_NHA 24h	p_NHA 48h
H1.4: K25UN	97.7393	97.3804	97.8356	1.00099	97.6372	1.00264	97.708		0.645142	0.464806
H1.4: K25ME1	2.17588	2.4476	2.10988	0.969668	2.27709	0.930334	2.19249		0.741027	0.588138
H1.4: K25ME2	0.0150387	0.0136561	0.0131951	0.87741	0.0198578	1.45413	0.0155637		0.60181	0.608265
H1.4: K25ME3	0.0126509	0.0111353	0.00646006	0.51064	0.0110279	0.99035	0.0105347		0.350935	0.989698
H1.4: K25AC	0.0571629	0.147248	0.0348377	0.609447	0.0548165	0.372273	0.0734439		0.418539	0.0996645
H2A: K36UN	99.9602	99.924	99.9685	1.00008	99.9386	1.00015	99.9251		0.587454	0.411371
H2A: K36AC	0.0397867	0.0760233	0.0314968	0.79164	0.0613808	0.807394	0.074911		0.587454	0.411371
H2A: K5UN	93.5991	93.7902	96.0632	1.02633	95.2649	1.01572	91.1634		0.0647503	0.0281527
H2A: K5AC	6.40087	6.20985	3.93681	0.615042	4.73507	0.76251	8.83664		0.0647503	0.0281527
H2A: K9UN	99.6806	99.7532	99.6832	1.00003	99.6922	0.999388	99.6403		0.962163	0.143256
H2A: K9AC	0.31945	0.246813	0.316847	0.99185	0.307817	1.24717	0.359657		0.962163	0.143256
H2A1: K13UN	99.9896	99.9866	99.9911	1.00001	99.9911	1.00005	99.9781		0.0409081	0.0884829
H2A1: K13AC	0.010409	0.013424	0.00894418	0.859275	0.00890137	0.663091	0.0218618		0.0409081	0.0884829
H2A1: K15UN	99.9951	99.9968	99.9854	0.999903	99.9872	0.999903	99.9844		0.395239	0.0655828
H2A1: K15AC	0.00488951	0.00316081	0.0146127	2.98859	0.0128223	4.05664	0.0156032		0.395239	0.0655828
H2A3: K13UN	99.9787	99.977	99.9836	1.00005	99.9777	1.00001	99.9672		0.307794	0.829264
H2A3: K13AC	0.0213192	0.0229585	0.0164001	0.769262	0.0223316	0.972695	0.0328246		0.307794	0.829264
H2A3: K15UN	99.7313	98.7042	99.6646	0.999331	99.296	1.006	98.6555		0.848529	0.38079
H2A3: K15AC	0.268722	1.29575	0.335405	1.24815	0.703951	0.543276	1.34448		0.848529	0.38079
H3.1: K27UN	18.7504	18.4499	14.9482	0.797218	14.0216	0.759983	17.7113		0.00210814	0.00562608
H3.1: K27ME1	27.5786	27.9246	26.1917	0.949713	24.4726	0.87638	26.0093		0.611687	0.159442
H3.1: K27ME2	33.8128	33.7115	35.832	1.05971	36.3766	1.07906	35.0813		0.343545	0.0692401
H3.1: K27AC	1.58757	1.75923	1.04039	0.655335	1.15827	0.658396	1.4742		0.116572	0.138728
H3.1: K27ME3	18.2706	18.1547	21.9877	1.20345	23.9709	1.32037	19.7239		0.0354072	0.010395
H3.1: K36UN	38.8835	38.6781	40.7047	1.04684	42.5836	1.10097	41.033		0.434247	0.0658823
H3.1: K36ME1	14.5249	13.925	16.4289	1.13108	15.9317	1.14411	14.6305		0.21198	0.0109367
H3.1: K36ME2	29.1542	29.7363	25.579	0.877368	24.1431	0.811907	27.6054		0.076504	0.0251902
H3.1: K36ME3	16.4083	15.6645	16.5432	1.00822	16.3216	1.04195	15.9994		0.939883	0.343445
H3.1: K36AC	1.02899	1.99616	0.744139	0.723174	1.01995	0.510953	0.731706		0.344496	0.0185919
H3.3: K27UN	23.8857	22.3572	21.935	0.918333	19.3114	0.863766	25.0831		0.272829	0.0352816
H3.3: K27ME1	35.9899	31.9708	35.0718	0.974489	33.8405	1.05848	35.1301		0.732205	0.663662
H3.3: K27ME2	25.6618	28.4187	31.7002	1.23531	30.2505	1.06446	27.8093		0.0981778	0.562211
H3.3: K27M	2.14535	3.10943	1.08451	0.505514	2.7593	0.887397	1.01576		0.334165	0.639457
H3.3: K27AC	4.49127	5.75687	3.45912	0.770188	4.43732	0.770787	4.69504		0.109837	0.197344
H3.3: K27ME3	7.82604	8.38698	6.74946	0.862436	9.40092	1.1209	6.26661		0.410894	0.448135
H3.3: K36UN	19.6188	19.0876	23.4025	1.19286	22.9743	1.20362	21.1828		0.134012	0.0743246
H3.3: K36ME1	9.19284	8.50929	10.6284	1.15616	10.9834	1.29076	8.73803		0.172028	0.00186197
H3.3: K36ME2	47.3021	43.7829	45.6501	0.965077	42.0416	0.960228	48.4181		0.412869	0.656312
H3.3: K36ME3	15.0584	18.6641	13.9896	0.929024	16.9201	0.906559	13.1244		0.687711	0.554635
H3.3: K36AC	8.82792	9.95603	6.32938	0.716974	7.08058	0.711185	8.53669		0.0268537	0.000194252
H3: K122UN	99.8446	99.7921	99.9308	1.00086	99.8153	1.00023	99.8553		0.168706	0.735032
H3: K122AC	0.155423	0.207942	0.0691866	0.445152	0.184747	0.888453	0.14472		0.168706	0.735032
H3: K14UN	75.8601	73.6798	70.9812	0.935685	73.2294	0.993887	72.1557		0.0655876	0.790543
H3: K14AC	24.1399	26.3202	29.0188	1.20211	26.7706	1.01711	27.8443		0.0655876	0.790543
H3: K18UN	91.4166	92.1207	93.5312	1.02313	93.5791	1.01583	89.5429		0.0974122	0.0342655
H3: K18ME1	0.436609	0.559941	0.313927	0.719012	0.441684	0.788805	0.309687		0.198293	0.343354
H3: K18AC	8.14675	7.31931	6.15489	0.755503	5.97919	0.816905	10.1475		0.0979492	0.0497304
H3: K23UN	81.0124	84.221	77.2748	0.953863	82.5697	0.980393	75.6503		0.328095	0.303215
H3: K23ME1	0.0391255	0.042109	0.028124	0.718814	0.0378806	0.899584	0.0325569		0.196039	0.760898
H3: K23AC	18.9484	15.7369	22.6971	1.19784	17.3924	1.1052	24.3172		0.327154	0.304206
H3: K56UN	99.7901	99.7701	99.8381	1.00048	99.7508	0.999807	99.9139		0.744524	0.778162
H3: K56ME1	0.108209	0.105381	0.0764221	0.706245	0.115115	1.09236	0.0498143		0.683586	0.791182
H3: K56AC	0.101679	0.124555	0.0854956	0.840839	0.134084	1.0765	0.036276		0.831388	0.771969
H3: K64UN	99.945	99.8257	99.9714	1.00026	99.9268	1.00101	99.9714		0.293087	0.0463262
H3: K64AC	0.0549575	0.174349	0.0285972	0.520352	0.0732369	0.42006	0.0285635		0.293087	0.0463262
H3: K79UN	70.8198	69.2695	70.0549	0.989199	69.5602	1.0042	70.4218		0.790931	0.931005
H3: K79ME1	15.1717	16.0866	17.4682	1.15137	14.1986	0.882635	14.2651		0.273419	0.009412
H3: K79ME2	13.3804	13.4843	12.0912	0.903644	15.2162	1.12844	14.7922		0.474756	0.599373
H3: K79ME3	0.454089	0.543263	0.173821	0.38279	0.575825	1.05994	0.325858		0.297883	0.916441
H3: K79AC	0.173937	0.616376	0.21194	1.21848	0.449227	0.72882	0.194977		0.772951	0.320936
H3: K9UN	27.5888	28.9523	26.8732	0.974063	30.642	1.05836	28.7358		0.871841	0.431886
H3: K9ME1	23.0942	25.0037	22.758	0.985442	23.9853	0.959269	22.6407		0.939559	0.535858
H3: K9ME2	43.9741	40.9265	44.4698	1.01127	39.4884	0.96486	42.94		0.950171	0.506169
H3: K9AC	0.932468	1.05059	1.23412	1.32349	1.68869	1.60738	1.49249		0.29227	0.0155728
H3: K9ME3	4.41041	4.06681	4.6649	1.0577	4.19566	1.03168	4.19113		0.814972	0.615125
H3: Q19UN	99.5309	99.3712	99.608	1.00077	99.5834	1.00214	99.6246		0.333363	0.202647
H3: Q19ME1	0.469107	0.62878	0.392007	0.835644	0.416571	0.662506	0.375375		0.333363	0.202647
H3: Q55UN	99.5507	99.3499	99.475	0.999239	99.4016	1.00052	99.4954		0.575786	0.142034
H3: Q55ME1	0.449284	0.650111	0.525033	1.1686	0.598439	0.920519	0.50463		0.575786	0.142034
H3: R42UN	98.8844	97.9049	99.2921	1.00412	98.2223	1.00324	99.5349		0.455347	0.766889
H3: R42ME2	1.11563	2.09508	0.707859	0.634495	1.77768	0.848498	0.465099		0.455347	0.766889
H3: R49UN	97.8306	96.8895	98.8179	1.01009	97.5335	1.00665	98.8967		0.371008	0.635685
H3: R49ME2	2.1694	3.11046	1.18207	0.544884	2.46653	0.792979	1.10327		0.371008	0.635685
H3R2UN: K4UN	89.1671	90.0991	90.6361	1.01647	90.7465	1.00719	89.7544		0.0945624	0.232108
H3R2UN: K4ME2	0.578372	0.69761	0.630542	1.0902	0.560003	0.802745	0.511772		0.62949	0.258681
H3R2UN: K4AC	0.861235	0.344691	0.121648	0.141248	0.539081	1.56396	0.252604		0.175743	0.192084
H3R2UN: K4ME1	8.44841	8.15279	8.18405	0.968709	7.42051	0.910181	9.05026		0.714176	0.0998723
H3R2UN: K4ME3	0.944896	0.705799	0.427685	0.452627	0.73386	1.03976	0.430945		0.228171	0.82612
H3R2UN: Q5UN	99.1294	99.1236	99.1788	1.0005	99.1191	0.999955	99.2002		0.510203	0.895292
H3R2UN: Q5ME1	0.870592	0.876394	0.821162	0.943222	0.880871	1.00511	0.799821		0.510203	0.895292
H4: K12UN	96.3387	96.4214	97.3623	1.01063	96.2348	0.998065	96.2923		0.417688	0.592484
H4: K12AC	3.66131	3.57859	2.6377	0.720425	3.76516	1.05214	3.70771		0.417688	0.592484
H4: K16UN	72.4763	72.6943	73.8098	1.0184	69.1785	0.951636	71.5277		0.657596	0.000425376
H4: K16AC	27.5237	27.3057	26.1902	0.951551	30.8215	1.12876	28.4723		0.657596	0.000425376
H4: K20UN	8.33109	6.74233	5.70895	0.685258	7.37695	1.09412	7.31096		0.133029	0.773108
H4: K20ME1	3.96422	3.20311	3.65157	0.921131	2.46458	0.769435	2.84257		0.659837	0.216162
H4: K20ME2	85.2483	84.7468	85.6781	1.00504	82.5027	0.97352	84.5266		0.924309	0.685019
H4: K20ME3	1.28518	1.18867	1.37706	1.0715	1.42929	1.20243	1.37922		0.432447	0.0259401
H4: K20AC	1.1712	4.11908	3.58434	3.06039	6.22644	1.51161	3.94063		0.525598	0.642528
H4: K5UN	94.4498	94.5211	95.7471	1.01374	95.1516	1.00667	94.9453		0.306935	0.225028
H4: K5AC	5.55019	5.47889	4.25286	0.766256	4.84842	0.884928	5.05469		0.306935	0.225028
H4: K8UN	93.8643	93.7514	94.9726	1.01181	93.5512	0.997865	93.5126		0.448354	0.612875
H4: K8AC	6.13565	6.24858	5.02736	0.819369	6.44877	1.03204	6.4874		0.448354	0.612875

## Sheet: U87
Histone PTMs	U87_DMSO_24h_mean	U87_DMSO_48h_mean	U87_JQ1_24h_mean	fold_JQ124/DMSO24_U87	U87_JQ1_48h_mean	fold_JQ148/DMSO48_U87	U87_Un_mean		p_U87 24h	p_U87 48h
H1.4: K25UN	97.8262	98.0558	97.6577	0.998278	97.4556	0.993879	98.103		0.502821	0.0120713
H1.4: K25ME1	1.93308	1.80476	2.19481	1.13539	2.2515	1.24754	1.71365		0.246004	0.00873293
H1.4: K25ME2	0.079307	0.0614962	0.0470551	0.593329	0.0822623	1.33768	0.0386393		0.00855862	0.650166
H1.4: K25ME3	0.0242348	0.014329	0.020581	0.849231	0.0993229	6.93159	0.0235062		0.786787	0.22147
H1.4: K25AC	0.137166	0.0636409	0.0798128	0.58187	0.111313	1.74907	0.121189		0.389927	0.374904
H2A: K36UN	99.9804	99.9847	99.9787	0.999983	99.9692	0.999845	99.9703		0.742805	0.201096
H2A: K36AC	0.019567	0.0153094	0.0213081	1.08898	0.0307842	2.01081	0.0297466		0.742805	0.201096
H2A: K5UN	94.8175	95.6666	94.9809	1.00172	94.9316	0.992317	95.5537		0.852814	0.335854
H2A: K5AC	5.18252	4.33339	5.01907	0.968463	5.0684	1.16961	4.44631		0.852814	0.335854
H2A: K9UN	99.2454	99.238	99.159	0.99913	99.1412	0.999024	99.1222		0.421442	0.462334
H2A: K9AC	0.754621	0.761969	0.841006	1.11447	0.858845	1.12714	0.877767		0.421442	0.462334
H2A1: K13UN	99.9931	99.9928	99.9914	0.999983	99.9901	0.999974	99.9879		0.657383	0.41642
H2A1: K13AC	0.00687777	0.00724212	0.00862393	1.25388	0.00987318	1.3633	0.0121212		0.657383	0.41642
H2A1: K15UN	99.9873	99.9903	99.9727	0.999854	99.9857	0.999954	99.9716		0.263779	0.390272
H2A1: K15AC	0.0127195	0.00969949	0.027299	2.14622	0.014285	1.47276	0.0284468		0.263779	0.390272
H2A3: K13UN	99.9787	99.9831	99.9811	1.00002	99.9846	1.00002	99.9682		0.370084	0.436086
H2A3: K13AC	0.021281	0.0169077	0.0188766	0.887019	0.0153961	0.910595	0.0318015		0.370084	0.436086
H2A3: K15UN	99.9775	99.9829	99.9561	0.999786	99.9405	0.999576	99.9642		0.366882	0.288952
H2A3: K15AC	0.0224942	0.0170912	0.0439203	1.95252	0.0595258	3.48283	0.0357816		0.366882	0.288952
H3.1: K27UN	20.1592	20.3674	15.5561	0.77166	14.266	0.700433	19.8429		0.00194076	0.000659495
H3.1: K27ME1	33.9392	31.5189	33.8292	0.99676	32.2975	1.0247	34.4678		0.948542	0.582501
H3.1: K27ME2	34.2034	35.2461	37.0009	1.08179	38.5665	1.0942	34.6556		0.0498612	0.0471173
H3.1: K27AC	0.70184	0.671563	0.479884	0.683751	0.471119	0.701526	1.03469		0.0471955	0.085363
H3.1: K27ME3	10.9964	12.1959	13.1339	1.19438	14.3989	1.18063	9.99898		0.0231195	0.0273598
H3.1: K36UN	30.516	36.6505	36.6634	1.20145	37.3876	1.02011	30.1834		0.0282007	0.596063
H3.1: K36ME1	19.5717	18.3107	17.8905	0.914102	19.0384	1.03974	19.8586		0.0376463	0.390247
H3.1: K36ME2	32.8631	29.3476	30.0706	0.915028	28.9854	0.987657	33.6772		0.144694	0.75286
H3.1: K36ME3	16.4066	15.2728	14.8756	0.906685	14.0775	0.921738	15.4394		0.0282766	0.0336716
H3.1: K36AC	0.642681	0.418438	0.499802	0.777683	0.511069	1.22137	0.841451		0.576285	0.451154
H3.3: K27UN	28.7361	29.8472	26.0377	0.906097	24.6347	0.82536	29.173		0.00755137	0.0133319
H3.3: K27ME1	41.5269	39.6543	41.584	1.00137	40.8288	1.02962	41.0346		0.972662	0.381928
H3.3: K27ME2	22.277	23.3997	24.799	1.11321	25.8496	1.1047	22.0644		0.0826966	0.167865
H3.3: K27M	0.125923	0.0827618	0.140067	1.11233	0.458887	5.54467	0.32408		0.805246	0.313615
H3.3: K27AC	3.30563	2.73831	2.8715	0.868669	2.89597	1.05758	3.50406		0.299591	0.623436
H3.3: K27ME3	4.02841	4.27772	4.56778	1.13389	5.33204	1.24647	3.8998		0.0960708	0.136763
H3.3: K36UN	13.9274	17.2901	19.5564	1.40417	19.2671	1.11435	13.5704		0.0109921	0.162613
H3.3: K36ME1	11.097	10.439	11.3836	1.02582	12.5002	1.19745	10.7358		0.507415	0.0315343
H3.3: K36ME2	51.6385	47.8418	47.4517	0.918921	47.0191	0.982804	51.2904		0.0717071	0.575986
H3.3: K36ME3	11.4456	10.3115	10.6964	0.934539	11.574	1.12243	11.1347		0.122753	0.166149
H3.3: K36AC	11.8914	14.1176	10.9118	0.917625	9.63963	0.682808	13.2688		0.29853	0.0098185
H3: K122UN	99.9869	99.9927	99.9928	1.00006	99.9606	0.999679	99.9542		0.173261	0.314809
H3: K122AC	0.0130801	0.0072922	0.00720696	0.550985	0.0393835	5.40078	0.0457519		0.173261	0.314809
H3: K14UN	62.7432	71.4613	69.7668	1.11194	73.1881	1.02416	55.0086		0.0117467	0.383711
H3: K14AC	37.2568	28.5387	30.2332	0.811482	26.8119	0.939492	44.9914		0.0117467	0.383711
H3: K18UN	95.6437	95.2181	95.8709	1.00237	95.8904	1.00706	94.0762		0.770396	0.194181
H3: K18ME1	0.264722	0.29965	0.312112	1.17901	0.317336	1.05902	0.256111		0.0364931	0.640881
H3: K18AC	4.09153	4.48225	3.817	0.932902	3.79222	0.846054	5.66766		0.728568	0.177974
H3: K23UN	73.5598	78.0389	77.7958	1.05759	80.4527	1.03093	59.1634		0.067048	0.234778
H3: K23ME1	0.0281475	0.0256865	0.0378003	1.34294	0.0272759	1.06187	0.0573568		0.252726	0.705425
H3: K23AC	26.4121	21.9354	22.1664	0.839251	19.52	0.889886	40.7792		0.0672755	0.234272
H3: K56UN	99.9375	99.9379	99.916	0.999785	99.9115	0.999736	99.8198		0.139117	0.150715
H3: K56ME1	0.0444932	0.0501662	0.0704392	1.58315	0.0585867	1.16785	0.146831		0.254408	0.161698
H3: K56AC	0.0179748	0.0119101	0.013561	0.754442	0.029889	2.50955	0.0333741		0.639836	0.198913
H3: K64UN	99.9741	99.9841	99.9819	1.00008	99.9702	0.999861	99.977		0.492295	0.316361
H3: K64AC	0.0259414	0.0158547	0.0180747	0.69675	0.0297968	1.87936	0.0230367		0.492295	0.316361
H3: K79UN	56.6997	60.0352	62.9221	1.10974	61.7269	1.02818	60.0726		0.00467992	0.553342
H3: K79ME1	27.7109	26.6166	23.8607	0.861059	23.6977	0.890333	24.7647		0.00754074	0.139292
H3: K79ME2	15.4961	13.2568	13.1545	0.848892	14.39	1.08548	15.0663		0.189346	0.737862
H3: K79ME3	0.0745995	0.0817739	0.0568349	0.761867	0.129107	1.57882	0.0732185		0.102264	0.440611
H3: K79AC	0.0187134	0.00961866	0.00589717	0.315131	0.0563354	5.85688	0.0232406		0.0691204	0.353496
H3: K9UN	26.4993	26.9547	24.7117	0.932542	29.0444	1.07752	29.0499		0.340822	0.292224
H3: K9ME1	20.8143	20.592	21.334	1.02497	23.1789	1.12563	19.5537		0.793834	0.322404
H3: K9ME2	44.9568	43.9677	45.2812	1.00722	39.7888	0.904955	43.1362		0.900252	0.265675
H3: K9AC	1.09891	0.82705	1.25201	1.13932	1.36334	1.64844	1.86238		0.357741	0.0126169
H3: K9ME3	6.63074	7.65849	7.42107	1.11919	6.62452	0.86499	6.39782		0.417596	0.317843
H3: Q19UN	99.4992	99.3601	99.63	1.00131	99.4036	1.00044	99.7128		0.248004	0.860437
H3: Q19ME1	0.500785	0.639871	0.36996	0.738761	0.596361	0.932002	0.287202		0.248004	0.860437
H3: Q55UN	99.6388	99.5615	99.5324	0.998932	99.4918	0.9993	99.5752		0.29507	0.367608
H3: Q55ME1	0.361177	0.438513	0.46758	1.2946	0.508249	1.15903	0.424777		0.29507	0.367608
H3: R42UN	99.9776	99.9622	99.9721	0.999945	99.8545	0.998923	99.9754		0.0941517	0.39932
H3: R42ME2	0.0224092	0.0378472	0.0279158	1.24573	0.145516	3.84482	0.024631		0.0941517	0.39932
H3: R49UN	99.7584	99.7331	99.6371	0.998785	99.3022	0.995679	99.7286		0.267651	0.362486
H3: R49ME2	0.241637	0.266884	0.362874	1.50173	0.697832	2.61474	0.271387		0.267651	0.362486
H3R2UN: K4UN	81.0075	81.267	85.6463	1.05726	83.1848	1.0236	76.166		0.0103895	0.567241
H3R2UN: K4ME2	1.00443	1.55178	1.17492	1.16973	0.957666	0.61714	2.0633		0.784981	0.166962
H3R2UN: K4AC	0.0336567	0.0446955	0.0457288	1.35869	0.0655553	1.46671	0.0704437		0.355769	0.365909
H3R2UN: K4ME1	17.6498	16.6681	12.786	0.724426	15.4759	0.92847	21.0896		0.00514857	0.693783
H3R2UN: K4ME3	0.304609	0.468363	0.347126	1.13958	0.316099	0.674902	0.610702		0.81784	0.241138
H3R2UN: Q5UN	99.3284	99.2595	99.2258	0.998967	99.284	1.00025	99.3939		0.0131677	0.571607
H3R2UN: Q5ME1	0.671637	0.74048	0.774204	1.15271	0.716044	0.967	0.606114		0.0131677	0.571607
H4: K12UN	96.3412	96.2798	96.926	1.00607	96.7306	1.00468	95.1328		0.309982	0.312379
H4: K12AC	3.65878	3.72018	3.07405	0.840184	3.26944	0.878838	4.8672		0.309982	0.312379
H4: K16UN	69.9415	67.9482	70.431	1.007	67.1769	0.988648	65.0739		0.743915	0.619714
H4: K16AC	30.0585	32.0518	29.569	0.983716	32.8231	1.02406	34.9261		0.743915	0.619714
H4: K20UN	5.3087	6.00987	3.00023	0.565154	4.07612	0.678238	4.19005		0.0226083	0.166108
H4: K20ME1	4.68896	5.14068	5.80248	1.23748	4.38891	0.853761	2.83489		0.23197	0.396526
H4: K20ME2	88.8686	87.7396	89.9573	1.01225	88.6277	1.01012	91.7892		0.439091	0.789411
H4: K20ME3	1.12318	1.10087	1.23334	1.09808	1.28915	1.17102	1.17765		0.108715	0.0116001
H4: K20AC	0.0105891	0.00894334	0.00667564	0.630427	1.61812	180.93	0.00818269		0.0178031	0.37469
H4: K5UN	94.3868	94.5939	95.4102	1.01084	95.4489	1.00904	95.1083		0.00478437	0.016478
H4: K5AC	5.61317	5.40608	4.58977	0.817679	4.5511	0.841847	4.8917		0.00478437	0.016478
H4: K8UN	93.1677	92.6485	93.8937	1.00779	93.665	1.01097	91.8453		0.497332	0.323156
H4: K8AC	6.83228	7.35153	6.10634	0.893749	6.33504	0.861731	8.15467		0.497332	0.323156

## Sheet: DIPG007
Histone PTMs	DIPG_DMSO_24h_mean	DIPG_DMSO_48h_mean	DIPG_JQ1_24h_mean	DIPG_JQ1_48h_mean
H1.4: K25UN	97.948	97.8819	97.8803	98.0034
H1.4: K25ME1	1.99642	2.0853	2.04636	1.9195
H1.4: K25ME2	0.0124099	0.00566696	0.0150956	0.0146854
H1.4: K25ME3	0.00315398	0.00216185	0.00329991	0.00676227
H1.4: K25AC	0.0399827	0.0249724	0.0549664	0.0556806
H2A: K36UN	99.966	99.9782	99.98	99.966
H2A: K36AC	0.0339855	0.0218175	0.0200046	0.0339946
H2A: K5UN	93.0217	92.9135	93.2871	92.1774
H2A: K5AC	6.9783	7.08647	6.71287	7.82259
H2A: K9UN	99.269	99.2324	99.3	99.2455
H2A: K9AC	0.731045	0.767591	0.700017	0.754475
H2A1: K13UN	99.9881	99.991	99.9935	99.987
H2A1: K13AC	0.0118611	0.00895398	0.00650162	0.0129668
H2A1: K15UN	99.9829	99.988	99.9965	99.9885
H2A1: K15AC	0.0171391	0.01203	0.00345304	0.0114834
H2A3: K13UN	99.9863	99.9837	99.9855	99.9789
H2A3: K13AC	0.0137225	0.0163114	0.0145083	0.0210899
H2A3: K15UN	99.969	99.9202	99.9395	99.6602
H2A3: K15AC	0.0309554	0.0798411	0.0604979	0.339817
H3.1: K27UN	63.2133	60.3452	61.8515	59.4694
H3.1: K27ME1	20.7449	21.7286	21.2422	21.4829
H3.1: K27ME2	12.8031	14.5943	14.0562	15.4631
H3.1: K27AC	1.77524	1.79405	1.44779	1.97394
H3.1: K27ME3	1.46347	1.53778	1.40228	1.61056
H3.1: K36UN	34.662	38.6608	35.9907	38.3341
H3.1: K36ME1	10.6173	10.2822	10.5385	10.6141
H3.1: K36ME2	33.6756	32.393	33.0018	32.1206
H3.1: K36ME3	19.9138	18.0337	19.409	18.1361
H3.1: K36AC	1.13117	0.630379	1.05999	0.795198
H3.3: K27UN	49.76	48.081	48.8863	44.8405
H3.3: K27ME1	16.7275	18.0927	17.0818	16.4571
H3.3: K27ME2	3.60206	4.03949	3.496	3.99735
H3.3: K27M	27.0509	26.8859	28.1981	31.3543
H3.3: K27AC	1.94992	1.95952	1.65321	2.02463
H3.3: K27ME3	0.909571	0.941439	0.684578	1.32616
H3.3: K36UN	12.5771	14.6688	14.9957	16.7655
H3.3: K36ME1	6.33674	5.91787	6.77416	6.68438
H3.3: K36ME2	47.9269	44.2366	46.5045	44.0193
H3.3: K36ME3	10.374	9.83348	9.42188	10.1679
H3.3: K36AC	22.7852	25.3432	22.3037	22.3629
H3: K122UN	99.9521	99.9883	99.9853	99.9645
H3: K122AC	0.0479089	0.0117363	0.0146978	0.0354793
H3: K14UN	60.25	61.8083	61.3976	61.5156
H3: K14AC	39.75	38.1917	38.6024	38.4844
H3: K18UN	93.5198	92.9447	94.0005	91.9777
H3: K18ME1	0.336598	0.389895	0.269892	0.325214
H3: K18AC	6.14362	6.66538	5.7296	7.69708
H3: K23UN	76.1398	76.8321	76.6389	74.0874
H3: K23ME1	0.0388791	0.0416429	0.0314559	0.03041
H3: K23AC	23.8213	23.1262	23.3296	25.8822
H3: K56UN	99.9148	99.9548	99.9459	99.9485
H3: K56ME1	0.0384932	0.0213853	0.0320023	0.0346343
H3: K56AC	0.0467393	0.0237906	0.0220991	0.0168262
H3: K64UN	99.9723	99.9806	99.9752	99.9715
H3: K64AC	0.0276671	0.019407	0.0247738	0.02846
H3: K79UN	67.9839	71.7786	69.9828	72.3036
H3: K79ME1	22.9884	18.4606	22.2858	19.5681
H3: K79ME2	8.83307	9.61864	7.65297	7.9605
H3: K79ME3	0.105853	0.083505	0.0650302	0.105917
H3: K79AC	0.0888376	0.0586178	0.0134685	0.0618173
H3: K9UN	19.295	17.5455	20.5836	19.0345
H3: K9ME1	18.7561	18.6108	19.5723	18.0114
H3: K9ME2	52.75	53.941	50.6557	53.1931
H3: K9AC	0.551124	0.590239	0.54359	0.996625
H3: K9ME3	8.64772	9.3125	8.64486	8.76444
H3: Q19UN	99.5754	99.466	99.463	99.6628
H3: Q19ME1	0.424629	0.533963	0.537032	0.337226
H3: Q55UN	99.4893	99.6639	99.548	99.5553
H3: Q55ME1	0.510704	0.336075	0.451977	0.444738
H3: R42UN	99.8553	99.8752	99.9187	99.8443
H3: R42ME2	0.144687	0.124815	0.0813476	0.155676
H3: R49UN	99.4518	99.7009	99.6124	99.466
H3: R49ME2	0.548231	0.299104	0.387574	0.533968
H3R2UN: K4UN	81.1556	83.569	84.1981	85.3583
H3R2UN: K4ME2	1.37846	1.37147	0.928283	1.03944
H3R2UN: K4AC	0.0685798	0.0994537	0.046251	0.192149
H3R2UN: K4ME1	16.7127	14.2684	14.3608	12.6829
H3R2UN: K4ME3	0.684679	0.691684	0.466602	0.727241
H3R2UN: Q5UN	99.2858	99.3272	99.2693	99.2855
H3R2UN: Q5ME1	0.71417	0.672849	0.730733	0.714511
H4: K12UN	96.8279	95.7903	97.4212	96.5471
H4: K12AC	3.17205	4.20967	2.57884	3.45289
H4: K16UN	60.0161	58.1747	61.8498	60.8942
H4: K16AC	39.9839	41.8253	38.1502	39.1058
H4: K20UN	7.38087	7.67746	6.51121	7.11178
H4: K20ME1	3.334	1.87322	3.63507	2.41156
H4: K20ME2	87.992	87.9789	88.5587	86.5328
H4: K20ME3	1.17345	1.11997	1.25166	1.19754
H4: K20AC	0.119712	1.35049	0.0433887	2.74633
H4: K5UN	96.4463	96.3034	96.4442	96.2447
H4: K5AC	3.55369	3.69658	3.55585	3.75528
H4: K8UN	93.8021	92.1863	94.4567	93.6186
H4: K8AC	6.19789	7.81367	5.54334	6.38136

## Sheet: SF8628
Histone PTMs	Mean_Ctrl	Mean_DMSO_24h	Mean_JQ1_24h	Mean_DMSO_48h	Mean_JQ1_48h	Fold_JQ1 24/DMSO 24h	Fold_JQ1 48/DMSO 48h	P_SF8628 24h	P_SF8628 48h
H1.4: K25UN	98.3455	98.3855	98.0512	98.3982	97.8771	0.996602	0.994704	0.0699166	0.0630487
H1.4: K25ME1	1.50606	1.45884	1.79321	1.48419	1.93931	1.22921	1.30665	0.0216664	0.0661216
H1.4: K25ME2	0.0392826	0.055755	0.0615519	0.0215159	0.0593977	1.10397	2.76064	0.784139	0.333682
H1.4: K25ME3	0.0356541	0.0426317	0.0241181	0.0233721	0.0394984	0.565732	1.68998	0.510005	0.260036
H1.4: K25AC	0.0734786	0.0572407	0.069882	0.0727473	0.0847247	1.22085	1.16464	0.319467	0.746042
H2A: K36UN	99.9684	99.9744	99.9803	99.9566	99.958	1.00006	1.00001	0.358831	0.94722
H2A: K36AC	0.0315555	0.025567	0.0197079	0.0433794	0.0420126	0.770834	0.968493	0.358831	0.94722
H2A: K5UN	89.2623	92.2719	94.2683	89.3469	91.7788	1.02164	1.02722	0.131717	0.0792007
H2A: K5AC	10.7377	7.72805	5.73173	10.6531	8.22116	0.741678	0.771719	0.131717	0.0792007
H2A: K9UN	99.1493	99.2341	99.2012	99.0149	98.7755	0.999668	0.997582	0.822218	0.105817
H2A: K9AC	0.85072	0.76587	0.798845	0.985074	1.22447	1.04306	1.24302	0.822218	0.105817
H2A1: K13UN	99.9832	99.9909	99.9902	99.9879	99.9874	0.999993	0.999995	0.797505	0.883923
H2A1: K13AC	0.0168273	0.00907265	0.00977273	0.0121081	0.012636	1.07716	1.0436	0.797505	0.883923
H2A1: K15UN	99.9888	99.9819	99.9592	99.989	99.9747	0.999774	0.999857	0.0168454	0.190383
H2A1: K15AC	0.0111632	0.0181474	0.0407853	0.0109793	0.0252993	2.24745	2.30427	0.0168454	0.190383
H2A3: K13UN	99.9739	99.9795	99.9807	99.9782	99.9737	1.00001	0.999954	0.625274	0.469288
H2A3: K13AC	0.0260649	0.0204985	0.0192608	0.0217532	0.0263452	0.93962	1.2111	0.625274	0.469288
H2A3: K15UN	99.215	99.7082	99.9822	99.7097	99.7019	1.00275	0.999922	0.355896	0.981505
H2A3: K15AC	0.784975	0.291814	0.0177505	0.29026	0.29807	0.0608282	1.02691	0.355896	0.981505
H3.1: K27UN	41.6291	44.4692	39.5238	45.9241	38.5522	0.888792	0.839476	0.00188926	0.000738404
H3.1: K27ME1	31.3559	31.0603	32.846	28.7054	33.5429	1.05749	1.16852	0.0233485	0.0130505
H3.1: K27ME2	19.5644	18.9857	22.3991	19.3043	21.6864	1.17979	1.12339	0.000924904	0.211018
H3.1: K27AC	3.37073	2.02814	1.15143	2.44394	1.69896	0.567727	0.69517	0.00850844	0.176431
H3.1: K27ME3	4.07994	3.45668	4.07958	3.62218	4.51959	1.1802	1.24775	0.00636183	0.031061
H3.1: K36UN	23.2681	23.9322	24.6922	26.3959	22.3231	1.03175	0.845705	0.54528	0.144798
H3.1: K36ME1	10.2395	12.5166	11.931	11.934	12.1744	0.953211	1.02015	0.475274	0.784625
H3.1: K36ME2	47.1697	44.8064	44.2293	42.973	45.7396	0.987119	1.06438	0.538559	0.258618
H3.1: K36ME3	17.8803	18.0402	18.1801	17.7164	18.7912	1.00775	1.06066	0.789885	0.24221
H3.1: K36AC	1.44236	0.704468	0.967428	0.980684	0.97172	1.37327	0.990859	0.486187	0.978436
H3.3: K27UN	40.7128	42.421	39.0916	42.1713	33.5613	0.921514	0.795833	0.00688511	0.0220237
H3.3: K27ME1	24.8783	24.9533	25.116	24.2689	24.4261	1.00652	1.00648	0.80031	0.927293
H3.3: K27ME2	6.90692	6.70222	7.80206	7.74227	9.84938	1.1641	1.27216	0.00120552	0.334704
H3.3: K27M	20.9867	21.5163	24.379	19.0102	25.9616	1.13305	1.36567	0.065372	0.0120242
H3.3: K27AC	4.50614	2.99378	2.434	3.94795	3.5206	0.813018	0.891753	0.156031	0.73588
H3.3: K27ME3	2.00915	1.41338	1.17733	2.85942	2.68103	0.832991	0.937615	0.127577	0.917516
H3.3: K36UN	9.20576	9.52421	12.1194	10.9163	11.526	1.27249	1.05585	0.0141372	0.605514
H3.3: K36ME1	5.36209	6.43094	7.52051	6.4799	8.30478	1.16943	1.28162	0.0496093	0.0696487
H3.3: K36ME2	61.8606	58.8572	59.3892	54.8651	57.773	1.00904	1.053	0.792916	0.514882
H3.3: K36ME3	11.5245	11.7376	11.2535	11.7282	14.5162	0.958757	1.23772	0.190882	0.256325
H3.3: K36AC	12.0471	13.4501	9.71739	16.0105	7.88	0.722479	0.492176	0.0408572	0.00492225
H3: K122UN	99.9318	99.969	99.9915	99.9222	99.8197	1.00023	0.998974	0.359379	0.465345
H3: K122AC	0.0681583	0.0310372	0.00853293	0.0777926	0.180288	0.274926	2.31755	0.359379	0.465345
H3: K14UN	69.368	68.7906	68.5486	69.4591	70.128	0.996482	1.00963	0.955316	0.661292
H3: K14AC	30.632	31.2094	31.4514	30.5409	29.872	1.00775	0.9781	0.955316	0.661292
H3: K18UN	89.9151	93.3684	94.9325	91.942	94.0354	1.01675	1.02277	0.041885	0.0611798
H3: K18ME1	0.34059	0.229488	0.239438	0.320571	0.31253	1.04336	0.974917	0.532878	0.905946
H3: K18AC	9.74429	6.40211	4.8281	7.73738	5.65208	0.754142	0.73049	0.0384529	0.0548875
H3: K23UN	73.6285	77.9887	78.251	78.2274	75.792	1.00336	0.968867	0.895761	0.471757
H3: K23ME1	0.0330575	0.0192363	0.0206714	0.0272622	0.0339192	1.07461	1.24418	0.480687	0.539697
H3: K23AC	26.3384	21.9921	21.7284	21.7453	24.1741	0.988008	1.11169	0.89511	0.47348
H3: K56UN	99.9043	99.9272	99.9035	99.88	99.8717	0.999763	0.999917	0.388704	0.911014
H3: K56ME1	0.0638306	0.0589631	0.074109	0.0645383	0.0616697	1.25687	0.955553	0.558716	0.914802
H3: K56AC	0.0318253	0.013805	0.022376	0.0554165	0.0665936	1.62086	1.20169	0.460321	0.828576
H3: K64UN	99.9626	99.9824	99.9802	99.9677	99.971	0.999977	1.00003	0.852062	0.866637
H3: K64AC	0.0374372	0.0175539	0.0198172	0.0323184	0.0290126	1.12894	0.89771	0.852062	0.866637
H3: K79UN	70.4017	64.0662	64.6896	74.2799	65.2748	1.00973	0.878768	0.856425	0.0272792
H3: K79ME1	18.4032	23.1063	22.9393	14.0126	19.6088	0.992772	1.39937	0.927033	0.0636403
H3: K79ME2	10.976	12.7106	12.2956	11.2265	14.4235	0.96735	1.28476	0.85741	0.0350308
H3: K79ME3	0.136049	0.0855366	0.0697242	0.360705	0.465826	0.815138	1.29143	0.667964	0.650503
H3: K79AC	0.0830878	0.0313612	0.00572827	0.120313	0.227143	0.182655	1.88794	0.392889	0.619516
H3: K9UN	28.1439	22.5724	16.3082	23.3575	20.6209	0.722487	0.882842	0.0884678	0.379888
H3: K9ME1	20.9638	19.1808	17.9251	21.0552	21.0355	0.934531	0.999061	0.427838	0.994047
H3: K9ME2	40.7067	48.1999	53.587	45.244	47.3248	1.11177	1.04599	0.198783	0.624816
H3: K9AC	1.94362	1.00414	0.964021	1.2622	1.60726	0.960046	1.27338	0.809163	0.373906
H3: K9ME3	8.24194	9.04276	11.2156	9.08111	9.41149	1.24029	1.03638	0.0661985	0.827158
H3: Q19UN	99.287	99.6618	99.3905	99.6269	99.3277	0.997278	0.996997	0.274051	0.114673
H3: Q19ME1	0.713039	0.33821	0.609515	0.37308	0.672289	1.80218	1.802	0.274051	0.114673
H3: Q55UN	99.4885	99.5168	99.5443	99.5047	99.2988	1.00028	0.997931	0.76346	0.149819
H3: Q55ME1	0.511496	0.483165	0.45565	0.495257	0.701153	0.943052	1.41573	0.76346	0.149819
H3: R42UN	99.8986	99.887	99.9732	99.5161	99.0502	1.00086	0.995318	0.400882	0.586699
H3: R42ME2	0.101427	0.113033	0.0268437	0.483864	0.949838	0.237486	1.96303	0.400882	0.586699
H3: R49UN	99.3171	99.5981	99.7632	98.557	97.9485	1.00166	0.993826	0.2658	0.700997
H3: R49ME2	0.68288	0.401859	0.236841	1.443	2.05148	0.589363	1.42167	0.2658	0.700997
H3R2UN: K4UN	82.8884	81.6264	85.2312	85.0153	84.2393	1.04416	0.990872	0.151575	0.675587
H3R2UN: K4ME2	0.851876	1.40876	0.977076	1.12385	0.698387	0.693573	0.621424	0.306416	0.291459
H3R2UN: K4AC	0.110262	0.0758459	0.0481926	0.244219	0.209183	0.635401	0.856539	0.0359187	0.888738
H3R2UN: K4ME1	15.8274	16.3794	13.4058	13.0343	14.461	0.818455	1.10946	0.174082	0.455429
H3R2UN: K4ME3	0.322128	0.509632	0.337803	0.582362	0.392186	0.662838	0.67344	0.18809	0.382306
H3R2UN: Q5UN	99.2596	99.2866	99.2703	99.3309	99.2834	0.999835	0.999522	0.666896	0.348926
H3R2UN: Q5ME1	0.740405	0.713363	0.729745	0.669127	0.716564	1.02296	1.07089	0.666896	0.348926
H4: K12UN	93.1549	95.512	96.5462	93.9768	94.4286	1.01083	1.00481	0.170875	0.602825
H4: K12AC	6.84505	4.48798	3.45378	6.02321	5.57137	0.769563	0.924984	0.170875	0.602825
H4: K16UN	50.5395	64.8485	64.327	61.1693	58.227	0.991957	0.951899	0.868973	0.189048
H4: K16AC	49.4605	35.1515	35.673	38.8307	41.773	1.01484	1.07577	0.868973	0.189048
H4: K20UN	5.27348	6.59307	1.89073	6.5592	6.38562	0.286775	0.973538	0.0020292	0.87101
H4: K20ME1	1.72647	2.93903	1.93862	1.74161	2.02209	0.659611	1.16104	0.0128305	0.292132
H4: K20ME2	91.6869	89.1972	94.8252	87.0991	89.2017	1.0631	1.02414	0.00212099	0.384173
H4: K20ME3	1.21193	1.17469	1.33905	1.02819	1.21556	1.13992	1.18223	0.0164068	0.00426125
H4: K20AC	0.101195	0.0960493	0.00635492	3.57191	1.17498	0.0661631	0.32895	0.343828	0.276056
H4: K5UN	93.847	94.8766	95.6469	93.9872	94.4089	1.00812	1.00449	0.176639	0.559403
H4: K5AC	6.15295	5.12336	4.35313	6.01284	5.59112	0.849662	0.929863	0.176639	0.559403
H4: K8UN	87.1089	91.8516	92.8455	89.1874	90.5512	1.01082	1.01529	0.291857	0.214606
H4: K8AC	12.8911	8.14839	7.15453	10.8126	9.44875	0.87803	0.873868	0.291857	0.214606
